# Supplementary material for: Single and Double Mutations in Tomato Ripening Transcription Factors Have Distinct Effects on Fruit Development and Quality Traits
Source: Front Plant Sci. 2021 Apr 27;12:647035. doi: 10.3389/fpls.2021.647035 (PMC8110730; doi:10.3389/fpls.2021.647035)
Supplement: Supplementary Table 3 — Summaries of RNAseq read mapping of tomato wild type, single mutant, and double mutant genotypes across immature, mature green (MG), and red ripe (RR) stages. The study each sample originates from is listed under dataset. Immature stages correspond to 7 days post anthesis (dpa), 17, and 27 dpa. Parsed reads are those that passed through quality and adapter trimming. [file Table_3.XLSX]

## Sheet: Sheet1
Supplemental Table S3. Summaries of RNAseq read mapping of tomato wild type, single mutant, and double mutant genotypes across immature, mature green (MG), and red ripe (RR) stagges. The study each sample originates from is listed under Dataset. Immature stages correspond to 7 days post anthesis (dpa), 17 dpa, 27 dpa. Parsed reads are those that passed through quality and adapter trimming.
Dataset	Genotype	Ripening Stage	Raw Reads	Parsed Reads	Mapped Reads
					Number	Percentage & (Transcriptome SL4.0)
Silva et al. 2020	WT	MG	11136461	17534077	1466374860	83.63
	WT	MG	14011019	15237563	1309516164	85.94
	WT	MG	15662773	16620932	1334827049	80.31
	WT	MG	13935316	11074416	959930379	86.68
	WT	RR	18245624	14417315	1279248360	88.73
	WT	RR	15178057	14537211	1259067845	86.61
	WT	RR	14301741	15572773	1369936841	87.97
	WT	RR	14243040	10268602	883818574	86.07
	Cnr	MG	16599083	16473941	1309678310	79.5
	Cnr	MG	14729888	17368541	1508457786	86.85
	Cnr	MG	15151164	15938679	1362916441	85.51
	Cnr	RR	16279734	17900945	1524086457	85.14
	Cnr	RR	17316565	17072780	1202435895	70.43
	Cnr	RR	18812957	16985925	1397601909	82.28
	Cnr	RR	17070056	13816843	1175813339	85.1
	nor	MG	20263561	15693137	1268476264	80.83
	nor	MG	15779828	15823698	1350077913	85.32
	nor	MG	14491324	14662231	1260511999	85.97
	nor	MG	17163005	17168029	1475420412	85.94
	nor	RR	16750388	14623307	1288605813	88.12
	nor	RR	15947122	15141825	1277212939	84.35
	nor	RR	15845261	15615587	1349811340	86.44
	nor	RR	13926646	14270749	1191322127	83.48
	rin	MG	17482415	13888039	1109237675	79.87
	rin	MG	16186508	16384362	1443134605	88.08
	rin	MG	14629751	14997132	1205619441	80.39
	rin	RR	15893721	13904592	1205389080	86.69
	rin	RR	16024019	14836432	1286615383	86.72
	rin	RR	17413358	13370047	1153567655	86.28
	rin	RR	13017714	14211024	1147540188	80.75
This study	Cnr/nor	MG	16472509	16434938	1433126594	87.2
	Cnr/nor	MG	18910543	18869425	1646546026	87.26
	Cnr/nor	MG	8463487	8445520	735689247	87.11
	Cnr/nor	MG	19625764	19581237	1366182905	69.77
	Cnr/nor	RR	17254163	17215660	1505337310	87.44
	Cnr/nor	RR	18893008	18850180	1621303982	86.01
	Cnr/nor	RR	16596830	16559943	1418855916	85.68
	nor Cnor	RR	15914784	15877530	1341651285	84.5
Lü et.al 2018	WT	7 dpa		5620660	5091756	90.59
	WT	7 dpa		6462724	5725973	88.6
	WT	7 dpa		2520300	2254408	89.45
	WT	7 dpa		2748297	2472918	89.98
	WT	17 dpa		4698712	4243407	90.31
	WT	17 dpa		3662628	3248751	88.7
	WT	17 dpa		2130884	1929515	90.55
	WT	17 dpa		2606385	2342098	89.86
	WT	17 dpa		4116936	3668190	89.1
	WT	17 dpa		3674696	3288853	89.5
	WT	27 dpa		3369813	3139318	93.16
	WT	27 dpa		6448630	5670925	87.94
	WT	27 dpa		3154492	2918536	92.52
	WT	27 dpa		2761742	2435580	88.19
	WT	27 dpa		4297680	3837398	89.29
	WT	27 dpa		3587395	3223274	89.85
	WT	MG (37 dpa)		5399668	4999013	92.58
	WT	MG (37 dpa)		3758137	3300396	87.82
	WT	MG (37 dpa)		4067660	3713774	91.3
	WT	MG (37 dpa)		2862349	2455037	85.77
	WT	MG (37 dpa)		5713579	5067945	88.7
	WT	MG (37 dpa)		3952156	3534018	89.42
	WT	MG (37 dpa)		4995006	4481020	89.71
	WT	MG (37 dpa)		3124415	2743549	87.81
	Cnr	7 dpa		5769859	5335966	92.48
	Cnr	7 dpa		5867580	5290797	90.17
	Cnr	17 dpa		4567240	4117367	90.15
	Cnr	17 dpa		2922099	2681026	91.75
	Cnr	27 dpa		5087346	4636098	91.13
	Cnr	27 dpa		5426509	4940836	91.05
	Cnr	MG (37 dpa)		5009134	4479168	89.42
	Cnr	MG (37 dpa)		6170286	5535364	89.71
	nor	7 dpa		5627059	5088549	90.43
	nor	7 dpa		5831072	5274205	90.45
	nor	7 dpa		2458048	2192825	89.21
	nor	17 dpa		5221096	4704730	90.11
	nor	17 dpa		4120548	3756704	91.17
	nor	17 dpa		4474874	4081533	91.21
	nor	17 dpa		1143317	1000974	87.55
	nor	27 dpa		3163706	2886882	91.25
	nor	27 dpa		5553651	5044381	90.83
	nor	27 dpa		5404426	4907759	90.81
	nor	27 dpa		2287822	2012139	87.95
	nor	37 dpa		4803828	4339298	90.33
	nor	MG (37 dpa)		4172583	3777857	90.54
	nor	MG (37 dpa)		4398591	4015474	91.29
	nor	MG (37 dpa)		1145228	1025437	89.54
	nor	MG (37 dpa)		5639135	5094958	90.35
	rin	7 dpa		5344274	4783125	89.5
	rin	7 dpa		4430552	3900658	88.04
	rin	7 dpa		5060577	4502901	88.98
	rin	7 dpa		2159449	1965099	91
	rin	17 dpa		5611347	4858304	86.58
	rin	17 dpa		3718488	3248843	87.37
	rin	17 dpa		3870509	3379341	87.31
	rin	17 dpa		10752726	9734443	90.53
	rin	27 dpa		3672876	3222214	87.73
	rin	27 dpa		5187661	4548022	87.67
	rin	27 dpa		4859109	4239087	87.24
	rin	27 dpa		6991958	6311640	90.27
	rin	27 dpa		6914726	145209	2.1
	rin	MG (37 dpa)		5271339	4489599	85.17
	rin	MG (37 dpa)		4165092	3606553	86.59
	rin	MG (37 dpa)		4265242	3752560	87.98
	rin	MG (37 dpa)		9880880	8688258	87.93
